# Supplementary material for: Modelling the mechanics of exploration in larval Drosophila
Source: PubMed Central journal article supplement (PMC6636753; doi:10.1371/journal.pcbi.1006635), 2019-07-05
Supplement: pcbi.1006635.s011.pdf [file pcbi.1006635.s011.pdf]

## S2 Appendix – Detailed small-amplitude analysis

In this appendix we present an analysis of the conservative, small oscillations of the larval body. We will attempt to apply the Liouville-Arnold integrability theorem, which tells us that the motion of a mechanical system must be (quasi)periodic if there exist a number of conserved quantities equal to the number of degrees of freedom, and which are in involution (a condition we will define later) [1]. We will find conserved quantities by *separating* the Hamiltonian describing our small-amplitude model. To illustrate this method, suppose we have a Hamiltonian  $H(q, p)$  which depends upon a set of generalised coordinates  $q$  (not necessarily the axial stretches defined earlier) and their canonically conjugate momenta  $p$ , and that this Hamiltonian can be separated into a sum of independent Hamiltonians

$$H(q, p) = H_1(q^1, p^1) + H_2(q^2, p^2) \quad (1)$$

where  $q^1, q^2$  are non-intersecting subsets of  $q$ , and  $p^1, p^2$  are the momenta conjugate to these coordinates. Taking the derivative of  $H_1$  and  $H_2$  with respect to time, we find

$$\dot{H}_1 = \frac{\partial H_1}{\partial q^1} \dot{q}^1 + \frac{\partial H_1}{\partial p^1} \dot{p}^1 \quad (2)$$

and

$$\dot{H}_2 = \frac{\partial H_2}{\partial q^2} \dot{q}^2 + \frac{\partial H_2}{\partial p^2} \dot{p}^2 \quad (3)$$

meanwhile, the (conservative) Hamilton's equations tell us that

$$\dot{q}^1 = \frac{\partial H}{\partial p^1} = \frac{\partial H^1}{\partial p^1} \quad (4)$$

$$\dot{q}^2 = \frac{\partial H}{\partial p^2} = \frac{\partial H^2}{\partial p^2} \quad (5)$$

$$\dot{p}^1 = -\frac{\partial H}{\partial q^1} = -\frac{\partial H^1}{\partial q^1} \quad (6)$$

$$\dot{p}^2 = -\frac{\partial H}{\partial q^2} = -\frac{\partial H^2}{\partial q^2} \quad (7)$$

substitution into the expressions above then gives

$$\dot{H}_1 = -\dot{p}^1 \dot{q}^1 + \dot{p}^1 \dot{q}^1 = 0 \quad (8)$$

$$\dot{H}_2 = -\dot{p}^2 \dot{q}^2 + \dot{p}^2 \dot{q}^2 = 0 \quad (9)$$

which shows that both  $H_1$  and  $H_2$  are conserved quantities. To test whether these quantities are in involution, we must check that their Poisson bracket vanishes [1, 2], i.e. we must check that

$$\{H_1, H_2\} = \sum_k \left( \frac{\partial H_1}{\partial p_k} \frac{\partial H_2}{\partial q_k} - \frac{\partial H_1}{\partial q_k} \frac{\partial H_2}{\partial p_k} \right) = 0 \quad (10)$$

Noting that  $q_k \in q^1$  implies  $p_k \in p^1$ , we see that the partial derivatives  $\frac{\partial H_2}{\partial q_k}$  and  $\frac{\partial H_2}{\partial p_k}$  vanish. Similarly, if  $q_k \in q^2$  then  $p_k \in p^2$  so that the partial derivatives  $\frac{\partial H_1}{\partial q_k}$  and  $\frac{\partial H_1}{\partial p_k}$  also vanish. Therefore, every term of the



$$H_t(\mathbf{Y}, \mathbf{p}_Y) = \frac{1}{2} \left[ \mathbf{p}_Y^T \Phi_t^T \Phi_t \mathbf{p}_Y + \omega_t^2 \mathbf{Y}^T \Phi_t^T \mathbf{D}_2 \Phi_t \mathbf{Y} \right] \quad (16)$$

If the coordinate transformations described by  $\Phi_a$  and  $\Phi_t$  are to separate the axial and transverse Hamiltonians into sums of independent terms, we see that the results of the matrix products  $\Phi_a^T \Phi_a$ ,  $\Phi_a^T \mathbf{D}_2 \Phi_a$  and  $\Phi_t^T \Phi_t$ ,  $\Phi_t^T \mathbf{D}_4 \Phi_t$  must be diagonal. We may use this condition to find the form of the transformation matrices  $\Phi_a$  and  $\Phi_t$ . To do this, we first note that  $\mathbf{D}_2$  and  $\mathbf{D}_4$  are real and symmetric, and that each can therefore be factored by eigendecomposition into a product of an orthogonal matrix of eigenvectors and a diagonal matrix of eigenvalues. Therefore, we can write

$$\mathbf{D}_2 = \mathbf{A} \mathbf{\Lambda}_a \mathbf{A}^T, \quad \mathbf{D}_4 = \mathbf{B} \mathbf{\Lambda}_t \mathbf{B}^T \quad (17)$$

where  $\mathbf{A}$  is the orthogonal eigenvector matrix and  $\mathbf{\Lambda}_a$  the diagonal eigenvalue matrix of  $\mathbf{D}_2$ . Similarly,  $\mathbf{B}$  is the orthogonal eigenvector matrix and  $\mathbf{\Lambda}_t$  the diagonal eigenvalue matrix of  $\mathbf{D}_4$ . We choose to identify the axial coordinate transformation with the axial eigenvector matrix, so that  $\Phi_a = \mathbf{A}$ , and identify the transverse coordinate transformation with the transverse eigenvector matrix, so that  $\Phi_t = \mathbf{B}$ . By the orthogonality of these matrices, we then have  $\Phi_a^T = \Phi_a^{-1}$  and  $\Phi_t^T = \Phi_t^{-1}$ . Effecting the eigendecomposition of  $\mathbf{D}_2$ , the axial Hamiltonian becomes

$$H_a(\mathbf{X}, \mathbf{p}_X) = \frac{1}{2} \left[ \mathbf{p}_X^T \Phi_a^{-1} \Phi_a \mathbf{p}_X + \omega_a^2 \mathbf{X}^T \Phi_a^{-1} \Phi_a \mathbf{\Lambda}_a \Phi_a^{-1} \Phi_a \mathbf{X} \right] = \frac{1}{2} \left[ \mathbf{p}_X^T \mathbf{p}_X + \omega_a^2 \mathbf{X}^T \mathbf{\Lambda}_a \mathbf{X} \right] \quad (18)$$

or, denoting the  $i$ 'th eigenvalue of  $\mathbf{D}_2$  as  $\lambda_{a,i}$ ,

$$H_a(\mathbf{X}, \mathbf{p}_X) = \sum_{i=1}^{N-1} \frac{1}{2} \left[ p_{X,i}^2 + \omega_a^2 \lambda_{a,i} X_i^2 \right] \quad (19)$$

Effecting the eigendecomposition of  $\mathbf{D}_4$ , the transverse Hamiltonian similarly decouples to give

$$H_t(\mathbf{Y}, \mathbf{p}_Y) = \sum_{i=1}^N \frac{1}{2} \left[ p_{Y,i}^2 + \omega_t^2 \lambda_{t,i} Y_i^2 \right] \quad (20)$$

where  $\lambda_{t,i}$  denotes the  $i$ 'th eigenvalue of  $\mathbf{D}_4$ . These final expressions show that the axial and transverse Hamiltonians are reduced to sums of independent terms, each of which contains just one modal coordinate and its conjugate momentum. Each term corresponds to the total mechanical energy associated with that mode, and is independently conserved according to our earlier results on separable Hamiltonians. This means that no energy transfer can occur between modal coordinates in the case of small oscillations. Given that we now have a number of conserved quantities equal to the number of degrees of freedom of our system, and these quantities are involution with one another, we can invoke the Liouville-Arnold integrability theorem to tell us that our mechanical system must execute periodic or quasiperiodic motion in the case of small oscillations. Indeed, the Hamilton's equations for the  $i$ 'th modes are

$$\dot{X}_i = \frac{\partial H}{\partial p_{X,i}} = p_{X,i}, \quad \dot{Y}_i = \frac{\partial H}{\partial p_{Y,i}} = p_{Y,i} \quad (21)$$

and

$$\dot{p}_{X,i} = -\frac{\partial H}{\partial X_i} = -\omega_{a,i}^2 X_i, \quad \dot{p}_{Y,i} = -\frac{\partial H}{\partial Y_i} = -\omega_{t,i}^2 Y_i \quad (22)$$

where we have introduced the parameters  $\omega_{a,i} = \omega_a \sqrt{\lambda_{a,i}} = (k_a/m) \sqrt{\lambda_{a,i}}$  and  $\omega_{t,i} = \omega_t \sqrt{\lambda_{t,i}} = (k_t/ml^2) \sqrt{\lambda_{t,i}}$ . These are harmonic oscillator equations in first order form. We can recover the familiar second-order harmonic oscillator equation by differentiating the first equation with respect to time, finding  $\dot{p}_{X,i} = \ddot{X}_i$ ,  $\dot{p}_{Y,i} = \ddot{Y}_i$ , before substituting into the second equation to give

$$\ddot{X}_i + \omega_{a,i}^2 X_i = 0, \quad \ddot{Y}_i + \omega_{t,i}^2 Y_i = 0, \quad (23)$$

The solution to the harmonic oscillator problem is well known [3], and in this case tells us

$$X_i = A_{a,i} \sin(\omega_{a,i} t + \theta_{a,i}), \quad Y_i = A_{t,i} \sin(\omega_{t,i} t + \theta_{t,i}) \quad (24)$$

These solutions tell us that the modal coordinates execute sinusoidal oscillations with constant amplitude  $A_{a,i}$ ,  $A_{t,i}$ , phase shift  $\theta_{a,i}$ ,  $\theta_{t,i}$ , and frequency  $\omega_{a,i}$  and  $\omega_{t,i}$ . To relate this back to our original small oscillation coordinates  $\mathbf{x}$  and  $\mathbf{y}$  we need to find the eigenvectors  $\Phi_a$ ,  $\Phi_t$ , and the corresponding eigenvalues  $\lambda_{a,i}$ ,  $\lambda_{t,i}$ , of  $\mathbf{D}_2$  and  $\mathbf{D}_4$ . We can find both  $\Phi_a$  and  $\Lambda_a$  analytically by noting that  $\mathbf{D}_2$  is a circulant matrix. Indeed, the  $i$ 'th eigenvector of an arbitrary circulant matrix is given by [4]

$$\Phi_{a,i} = \frac{1}{\sqrt{N-1}} [1, z_i, z_i^2, \dots, z_i^{N-2}]^T \quad (25)$$

where we have used  $\Phi_{a,i}$  to denote the  $i$ 'th column of the eigenvector matrix  $\Phi_a$ , and  $z_i = e^{\frac{2\pi i j}{N-1}}$  is the  $i$ 'th element of the  $(N-1)$ 'th roots of unity, with  $j = \sqrt{-1}$  the imaginary unit. Using Euler's complex exponential formula the  $k$ 'th element of the  $i$ 'th axial mode shape may be written

$$\Phi_{a,k,i} = \frac{1}{\sqrt{N-1}} \left[ \cos\left(2\pi i \frac{k}{N-1}\right) + j \sin\left(2\pi i \frac{k}{N-1}\right) \right] \quad (26)$$

The real and complex parts of each vector can be considered as independent mode shapes, so that the modes thus come in pairs with identical spatial frequency,

$$\Phi_{a,k,i} = \frac{1}{\sqrt{N-1}} \cos\left(2\pi i \frac{k}{N-1}\right), \text{ or } \Phi_{a,k,i} = \frac{1}{\sqrt{N-1}} \sin\left(2\pi i \frac{k}{N-1}\right), \quad i \in [0, N/2 - 1] \quad (27)$$

For an arbitrary  $(N-1) \times (N-1)$  circulant matrix with entries

$$\mathbf{A} = \begin{bmatrix} c_0 & c_{N-2} & \cdots & c_2 & c_1 \\ c_1 & c_0 & c_{N-2} & & c_2 \\ \vdots & c_1 & c_0 & \ddots & \vdots \\ c_{N-3} & & \ddots & \ddots & c_{N-2} \\ c_{N-2} & c_{N-3} & \cdots & c_1 & c_0 \end{bmatrix} \quad (28)$$

the eigenvalue corresponding to the  $i$ 'th eigenvector is given by [4]

$$\lambda_i = c_0 + c_{N-2} z_i + c_{N-3} z_i^2 + \cdots + c_1 z_i^{N-2} \quad (29)$$

In the case of  $\mathbf{D}_2$  we have  $c_0 = 2$  and  $c_1 = c_{N-2} = -1$ , so that this reduces to

$$\lambda_i = 2 - z_i - z_i^{N-2} \quad (30)$$

However, the  $N-1$ 'th roots of unity satisfy  $z_i^{N-2} = \bar{z}_i$ , where the bar indicates the complex conjugate. Therefore,

$$\lambda_i = 2 - 2\text{Re}[z_i] \quad (31)$$

the real part of  $z_i$  can be found by using Euler's complex exponential formula, yielding

$$\lambda_i = 2 - 2\cos\left(\frac{2\pi i}{N-1}\right) \quad (32)$$

By using the trigonometric identity  $\sqrt{2-2\cos(x)} = 2\sin\left(\frac{x}{2}\right)$  we may now calculate the frequency of oscillation of the  $i$ 'th axial mode to be

$$\omega_{a,i} = 2\omega_a \left| \sin\left(\frac{\pi i}{N-1}\right) \right| \quad (33)$$

It is marked that the axial modes come in pairs with identical temporal and spatial frequencies. This property allows us to construct travelling wave solutions for the axial motion by combining sinusoidal

oscillations within a pair of modes with equal magnitude and a  $90^\circ$  temporal phase shift relative to each other. To see this mathematically, we re-examine our expression for the axial mode shapes (27). We multiply these vectors by modal coordinates oscillating with unity amplitude, identical temporal frequency  $\omega_{a,i}$  and a  $\pm 90^\circ$  phase shift, and sum the result, so that the  $k$ 'th segment boundary displacement for the  $i$ 'th axial mode can be written

$$x_k = \cos(\omega_{a,i}t) \cos\left(2\pi i \frac{k}{N-1}\right) + \cos\left(\omega_{a,i}t \pm \frac{\pi}{2}\right) \sin\left(2\pi i \frac{k}{N-1}\right) \quad (34)$$

where we have dropped the normalising factor  $\frac{1}{\sqrt{N-1}}$  in (27). This is equivalent to

$$x_k = \cos(\omega_{a,i}t) \cos\left(2\pi i \frac{k}{N-1}\right) \pm \sin(\omega_{a,i}t) \sin\left(2\pi i \frac{k}{N-1}\right) \quad (35)$$

Using the identity  $\cos(a)\cos(b) \pm \sin(a)\sin(b) = \cos(a \pm b)$ , this further simplifies to

$$x_k = \cos\left(\omega_{a,i}t \pm 2\pi i \frac{k}{N-1}\right) \quad (36)$$

Interpreting  $0 \leq \frac{k}{N-1} \leq 1$  as a spatial coordinate ranging over the undeformed configuration of the body, this is in the form of a sinusoidal travelling wave, and the choice of a minus or plus sign in the argument corresponds to the choice of a forward- or backward-propagating wave, respectively.

## References

1. Arnol'd VI. *Mathematical Methods of Classical Mechanics*. vol. 60 of Graduate Texts in Mathematics. 2nd ed. Springer; 1989.
2. Landau LD, Lifshitz EM. *Mechanics*. vol. 1 of Course of Theoretical Physics. 3rd ed. Butterworth-Heinemann; 1976.
3. Tenenbaum M, Pollard H. *Ordinary Differential Equations*. 1st ed. Dover Books on Mathematics. Dover Publications, Inc.; 1985.
4. Gray RM. *Toeplitz and Circulant Matrices: A review*. 1st ed. Now Publishers Inc.; 2006.
