# Supplementary material for: Modelling the mechanics of exploration in larval Drosophila
Source: PubMed Central journal article supplement (PMC6636753; doi:10.1371/journal.pcbi.1006635), 2019-07-05
Supplement: pcbi.1006635.s016.pdf [file pcbi.1006635.s016.pdf]

Table S1: neural parameter values. All segments are identical. Values given in larval units (seg = resting segment length, segmass = mass of a single segment boundary, nondim = dimensionless/nondimensional).

| symbol                                | description                                               | value                      |
|---------------------------------------|-----------------------------------------------------------|----------------------------|
| $\theta_{\text{SN}}$                  | sensory neuron threshold                                  | $1/100 \text{ seg s}^{-1}$ |
| $\theta_{\text{IN}}$                  | interneuron threshold                                     | $1/2$ (nondim.)            |
| $\theta_{\text{MN}}$                  | motor neuron threshold                                    | $1/2$ (nondim.)            |
| $w_{\text{SN} \rightarrow \text{MN}}$ | sensory neuron $\rightarrow$ motor neuron synaptic weight | $1$ (nondim.)              |
| $w_{\text{MN} \rightarrow \text{MF}}$ | motor neuron $\rightarrow$ muscle fibre synaptic weight   | $1$ (nondim.)              |
| $w_{\text{SN} \rightarrow \text{IN}}$ | sensory neuron $\rightarrow$ interneuron synaptic weight  | $1$ (nondim.)              |
| $w_{\text{IN} \rightarrow \text{MN}}$ | interneuron $\rightarrow$ motor neuron synaptic weight    | $-2$ (nondim.)             |
| $w_{\text{IN} \rightarrow \text{IN}}$ | interneuron $\rightarrow$ interneuron synaptic weight     | $-2$ (nondim.)             |
