# Supplementary material for: Modelling the mechanics of exploration in larval Drosophila
Source: PubMed Central journal article supplement (PMC6636753; doi:10.1371/journal.pcbi.1006635), 2019-07-05
Supplement: pcbi.1006635.s017.pdf [file pcbi.1006635.s017.pdf]

Table S2: mechanical parameters for **Fig 4. Emergence of limit cycles for forward and backward locomotion in the dissipative, small-amplitude model**. All segments are identical. Values given in larval units (seg = resting segment length, segmass = mass of a single segment boundary, nondim = dimensionless/nondimensional).

| symbol   | description                    | value                                           |
|----------|--------------------------------|-------------------------------------------------|
| $b$      | reflex gain                    | varies (see figure) segmass seg s <sup>-2</sup> |
| $l$      | equilibrium segment length     | 1 seg                                           |
| $m$      | segment mass                   | 1 segmass                                       |
| $k_a$    | axial stiffness                | $(2\pi)^2$ segmass s <sup>-2</sup>              |
| $\eta_a$ | axial coefficient of viscosity | $2\pi$ segmass s <sup>-1</sup>                  |
| $\mu$    | coefficient of friction        | 1 segmass seg s <sup>-2</sup>                   |
