# Supplementary material for: Modelling the mechanics of exploration in larval Drosophila
Source: PubMed Central journal article supplement (PMC6636753; doi:10.1371/journal.pcbi.1006635), 2019-07-05
Supplement: pcbi.1006635.s018.pdf [file pcbi.1006635.s018.pdf]

Table S3: mechanical parameters for **Fig 6** and **Fig 7. Emergence of deterministic chaos in the conservative head dynamics as amplitude of motion is increased.** Values given in larval units (seg = resting segment length, segmass = mass of a single segment boundary, nondim = dimensionless/nondimensional).

| symbol     | description                               | value                         |
|------------|-------------------------------------------|-------------------------------|
| $\epsilon$ | amplitude                                 | varies (see figure) (nondim.) |
| $\lambda$  | ratio of transverse and axial frequencies | $e/6$ (nondim.)               |
| $E$        | total mechanical energy                   | $1/2$ (nondim.)               |
