# Supplementary material for: Modelling the mechanics of exploration in larval Drosophila
Source: PubMed Central journal article supplement (PMC6636753; doi:10.1371/journal.pcbi.1006635), 2019-07-05
Supplement: pcbi.1006635.s019.pdf [file pcbi.1006635.s019.pdf]

Table S4: mechanical parameters for **Fig 8. Conservative planar motion of the body is chaotic at large amplitudes**. All segments are identical. Values given in larval units (seg = resting segment length, segmass = mass of a single segment boundary, nondim = dimensionless/nondimensional).

| symbol | description                            | value                                                           |
|--------|----------------------------------------|-----------------------------------------------------------------|
| $l$    | equilibrium segment length             | 1 seg                                                           |
| $m$    | segment mass                           | 1 segmass                                                       |
| $k_a$  | axial stiffness                        | 3.15 segmass s <sup>-2</sup>                                    |
| $k_t$  | transverse stiffness                   | 8.45 segmass seg <sup>2</sup> s <sup>-2</sup> rad <sup>-1</sup> |
| $k_c$  | incompressibility constraint stiffness | 1000 segmass s <sup>-2</sup>                                    |
