# Supplementary material for: Modelling the mechanics of exploration in larval Drosophila
Source: PubMed Central journal article supplement (PMC6636753; doi:10.1371/journal.pcbi.1006635), 2019-07-05
Supplement: pcbi.1006635.s020.pdf [file pcbi.1006635.s020.pdf]

Table S5: mechanical parameters for **Fig 9. Dissipative planar motion is chaotic** and **Fig 10. Deterministic exploration**. Values given in larval units (seg = resting segment length, segmass = mass of a single segment boundary, nondim = dimensionless/nondimensional)

| symbol                                      | description                                                                           | value                                                            |
|---------------------------------------------|---------------------------------------------------------------------------------------|------------------------------------------------------------------|
| $l$                                         | equilibrium segment length                                                            | 1 seg                                                            |
| $m$                                         | segment mass                                                                          | 1 segmass                                                        |
| $k_a$                                       | axial stiffness                                                                       | 2 segmass s <sup>-2</sup>                                        |
| $\eta_a$                                    | axial coefficient of viscosity                                                        | 0.25 segmass s <sup>-1</sup>                                     |
| $k_{t,11}$                                  | transverse stiffness about T1-T2 boundary                                             | 0.05 segmass seg <sup>2</sup> s <sup>-2</sup> rad <sup>-1</sup>  |
| $k_{t,10}$                                  | transverse stiffness about T2-T3 boundary                                             | 0.07 segmass seg <sup>2</sup> s <sup>-2</sup> rad <sup>-1</sup>  |
| $k_{t,9}$                                   | transverse stiffness about T3-A1 boundary                                             | 0.1 segmass seg <sup>2</sup> s <sup>-2</sup> rad <sup>-1</sup>   |
| $k_{t,8}$                                   | transverse stiffness about A1-A2 boundary                                             | 0.15 segmass seg <sup>2</sup> s <sup>-2</sup> rad <sup>-1</sup>  |
| $k_{t,2}, k_{t,3}, \dots, k_{t,7}$          | transverse stiffness about A7-A8, A6-A7, ..., A2-A3 boundaries                        | 0.2 segmass seg <sup>2</sup> s <sup>-2</sup> rad <sup>-1</sup>   |
| $\eta_{t,11}$                               | transverse viscosity about T1-T2 boundary                                             | 0.033 segmass seg <sup>2</sup> s <sup>-1</sup> rad <sup>-1</sup> |
| $\eta_{t,10}$                               | transverse viscosity about T2-T3 boundary                                             | 0.067 segmass seg <sup>2</sup> s <sup>-1</sup> rad <sup>-1</sup> |
| $\eta_{t,9}$                                | transverse viscosity about T3-A1 boundary                                             | 0.33 segmass seg <sup>2</sup> s <sup>-1</sup> rad <sup>-1</sup>  |
| $\eta_{t,8}$                                | transverse viscosity about A1-A2 boundary                                             | 0.67 segmass seg <sup>2</sup> s <sup>-1</sup> rad <sup>-1</sup>  |
| $\eta_{t,2}, \eta_{t,3}, \dots, \eta_{t,7}$ | transverse viscosity about A7-A8, A6-A7, ..., A2-A3 boundaries                        | 1.67 segmass seg <sup>2</sup> s <sup>-1</sup> rad <sup>-1</sup>  |
| $\mu_{f,1}, \mu_{f,2}, \dots, \mu_{f,12}$   | (forward) coefficient of friction, all segments                                       | 0 segmass seg s <sup>-2</sup>                                    |
| $\mu_{b,12}$                                | (backward) coefficient of friction at head extremity                                  | 100 segmass seg s <sup>-2</sup>                                  |
| $\mu_{b,11}$                                | (backward) coefficient of friction at T1-T2 boundary                                  | 100 segmass seg s <sup>-2</sup>                                  |
| $\mu_{b,10}$                                | (backward) coefficient of friction at T2-T3 boundary                                  | 0.2 segmass seg s <sup>-2</sup>                                  |
| $\mu_{b,9}$                                 | (backward) coefficient of friction at T3-A1 boundary                                  | 0.2 segmass seg s <sup>-2</sup>                                  |
| $\mu_{b,1}, \mu_{b,2}, \dots, \mu_{b,8}$    | (backward) coefficient of friction at tail extremity and A7-A8, ..., A1-A2 boundaries | 5 segmass seg s <sup>-2</sup>                                    |
| $\mu_{p,12}$                                | directional “focus” of friction at head extremity                                     | 4.5 (nondim.)                                                    |
| $\mu_{p,11}$                                | directional “focus” of friction at T1-T2 boundary                                     | 4.5 (nondim.)                                                    |
| $\mu_{p,1}, \mu_{p,2}, \dots, \mu_{p,10}$   | directional “focus” of friction at tail extremity and A7-A8, ..., T2-T3 boundaries    | 1.5 (nondim.)                                                    |
| $b_9, b_{10}, b_{11}$                       | reflex gain in segments T3, T2, T1                                                    | 0.09 segmass seg s <sup>-2</sup>                                 |
| $b_1, b_2, \dots, b_8$                      | reflex gain in segments A8, A7, ..., A1                                               | 0.48 N                                                           |
| $k_c$                                       | incompressibility constraint stiffness                                                | 1000 segmass s <sup>-2</sup>                                     |
